# Supplementary material for: The BRAIN test: a keyboard-tapping test to assess disability and clinical features of multiple sclerosis
Source: Springer Nature journal article supplement (doi:10.1007/s00415-017-8690-x), 2017-12-04
Supplement: MOESM1 [file 15276908]

| Pyramidal Function |                                                                       |
|--------------------|-----------------------------------------------------------------------|
| 0                  | Normal                                                                |
| 1                  | Abnormal Signs without disability                                     |
| 2                  | Minimal disability                                                    |
| 3                  | Mild-to-moderate hemiparesis/paraparesis <i>or</i> severe monoparesis |
| 4                  | Marked paraparesis/hemiparesis <i>or</i> moderate tetraparesis        |
| 5                  | Paraplegia/hemiplegia <i>or</i> marked tetraparesis                   |
| 6                  | Tetraplegia                                                           |

*Table of Functional System (FS) score for pyramidal function (Kutzke et al, 1983)*

| Cerebellar Function |                                                                                  |
|---------------------|----------------------------------------------------------------------------------|
| 0                   | Normal                                                                           |
| 1                   | Abnormal Signs without disability                                                |
| 2                   | Mild ataxia <i>or</i> moderate station ataxia <i>or</i> tandem gait not possible |
| 3                   | Moderate limb ataxia <i>or</i> moderate gait/truncal ataxia                      |
| 4                   | Severe gait/truncal ataxia <i>and</i> severe ataxia in at least 3 limbs          |
| 5                   | Unable to perform co-ordinated movements due to ataxia                           |
| X                   | Pyramidal weakness interfere with cerebellar testing                             |

*Table of Functional System (FS) score for cerebellar function (Kutzke et al, 1983)*

|                         | Pyramidal dysfunction |         |         | Cerebellar dysfunction |         |         |
|-------------------------|-----------------------|---------|---------|------------------------|---------|---------|
|                         | Absent                | Present | p-value | Absent                 | Present | p-value |
| KS (taps)               | 67.5                  | 49.6    | <0.001  | 64.9                   | 46.8    | <0.001  |
| AT (msec)               | 80.5                  | 103.0   | 0.083   | 80.5                   | 112.0   | 0.006   |
| IS (msec <sup>2</sup> ) | 9742                  | 11509   | 0.187   | 4317                   | 13115   | 0.008   |

*Table of comparison between BRAIN test scores in patients with and without pyramidal or cerebellar dysfunction. Mean scores with p-values according to the unpaired t-test are shown for KS and median scores with p-values according to the Mann Whitney test are shown for AT and IS.*
